# Supplementary figures and images for: Threshold photoelectron–photoion coincidence spectroscopy study of CHCl2F+, CHClF+2 and CH2ClF+: Steric influence of the chlorine, fluorine and hydrogen atoms
Source: Royal Society of Chemistry journal article supplement (doi:10.1039/b501838b), 2005-01-01

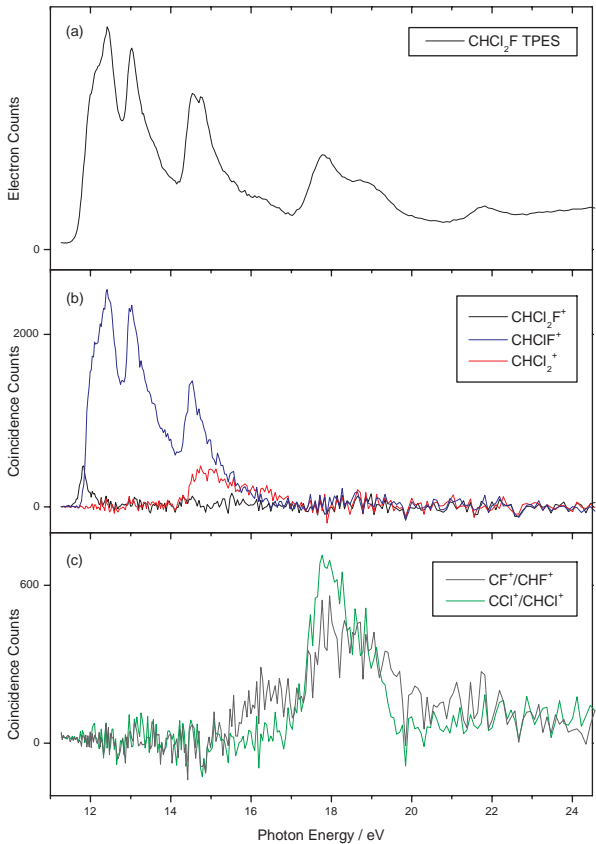

Supplement: fig1.pdf [file fig1.pdf]

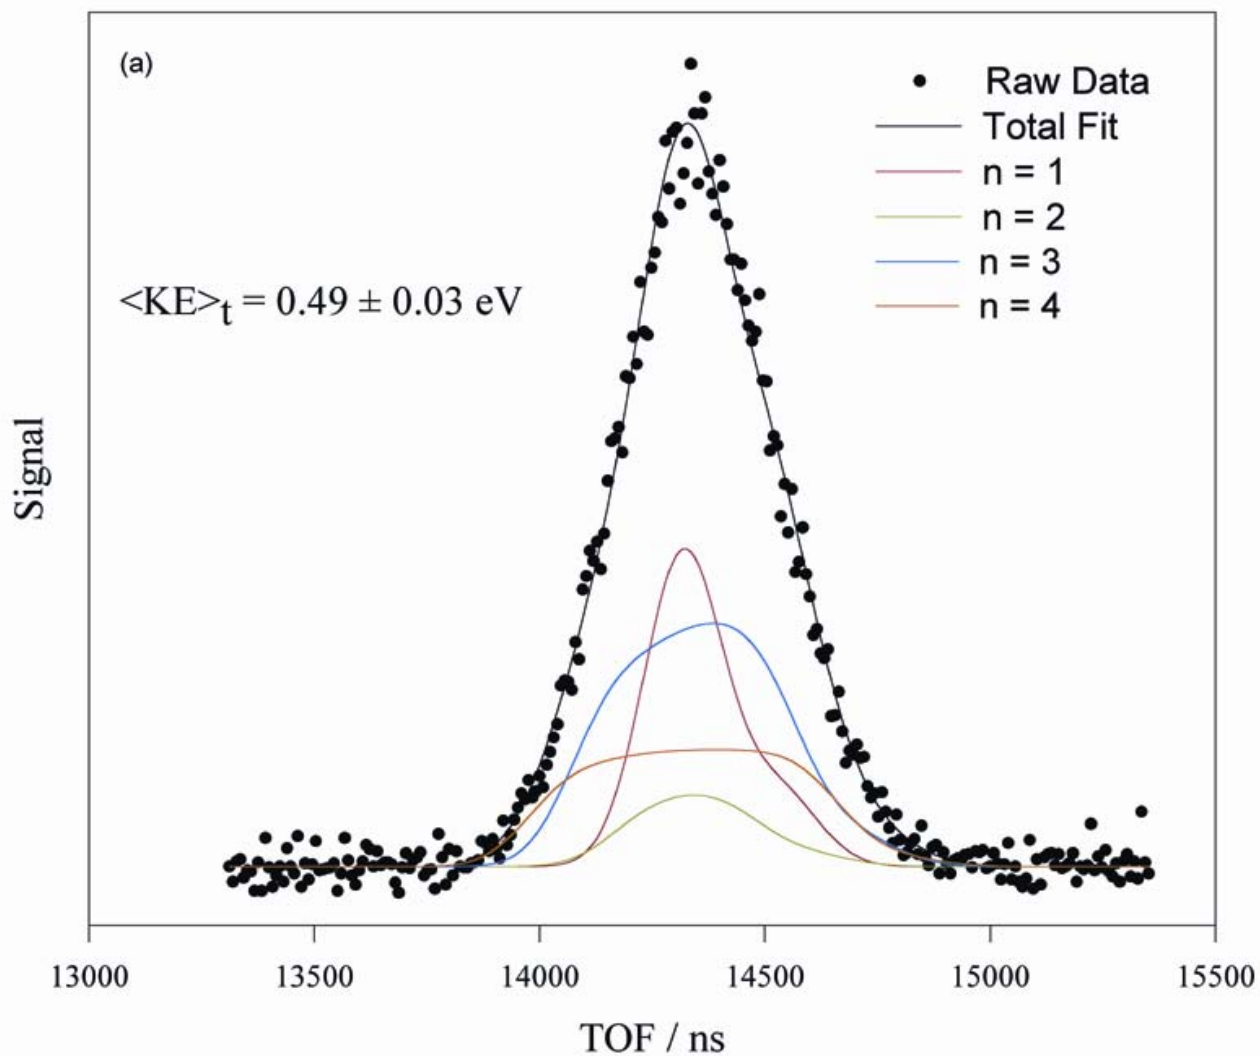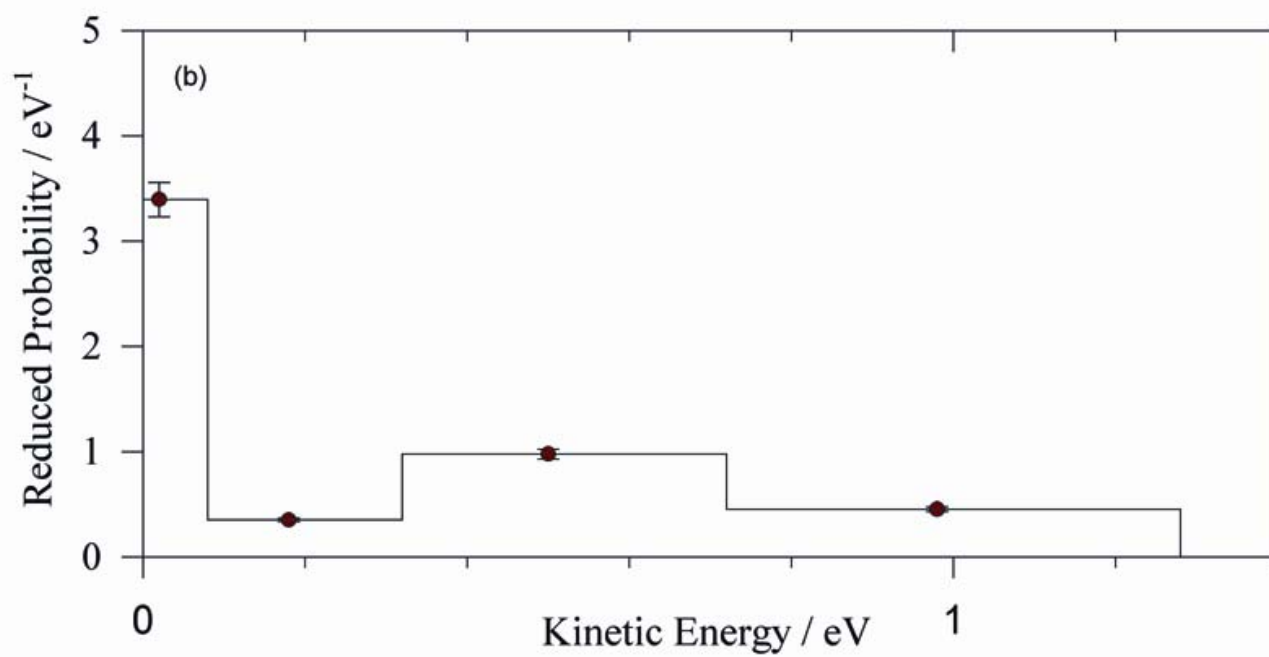

Supplement: fig2.pdf [file fig2.pdf]

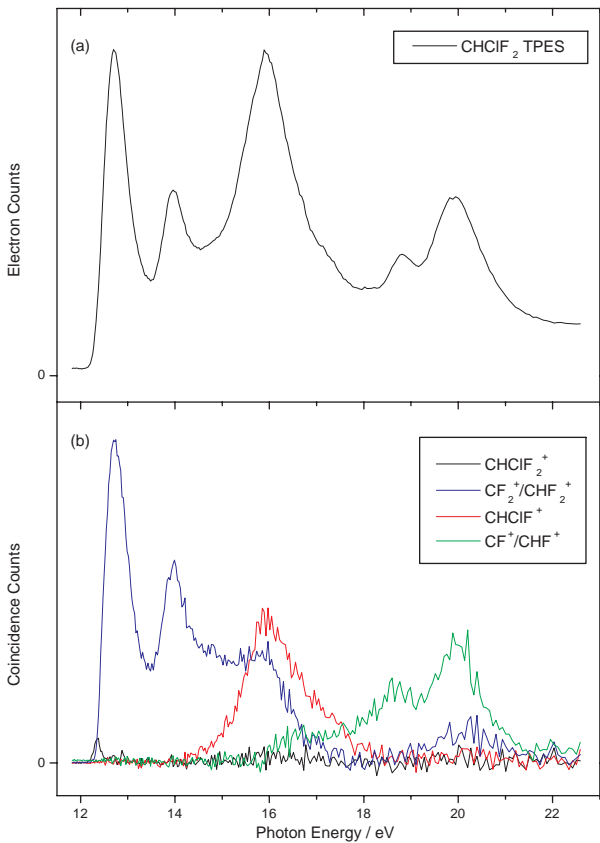

Supplement: fig3.pdf [file fig3.pdf]

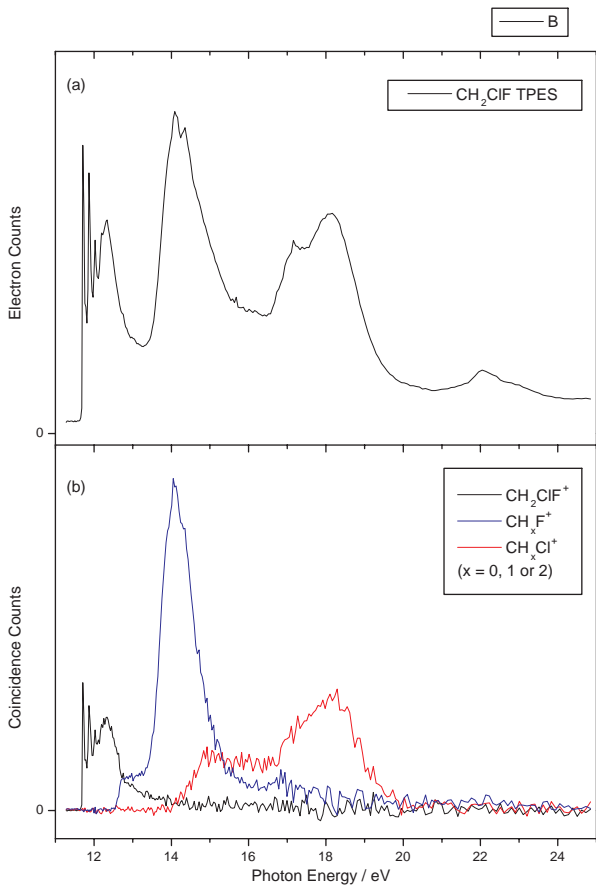

Supplement: fig4.pdf [file fig4.pdf]

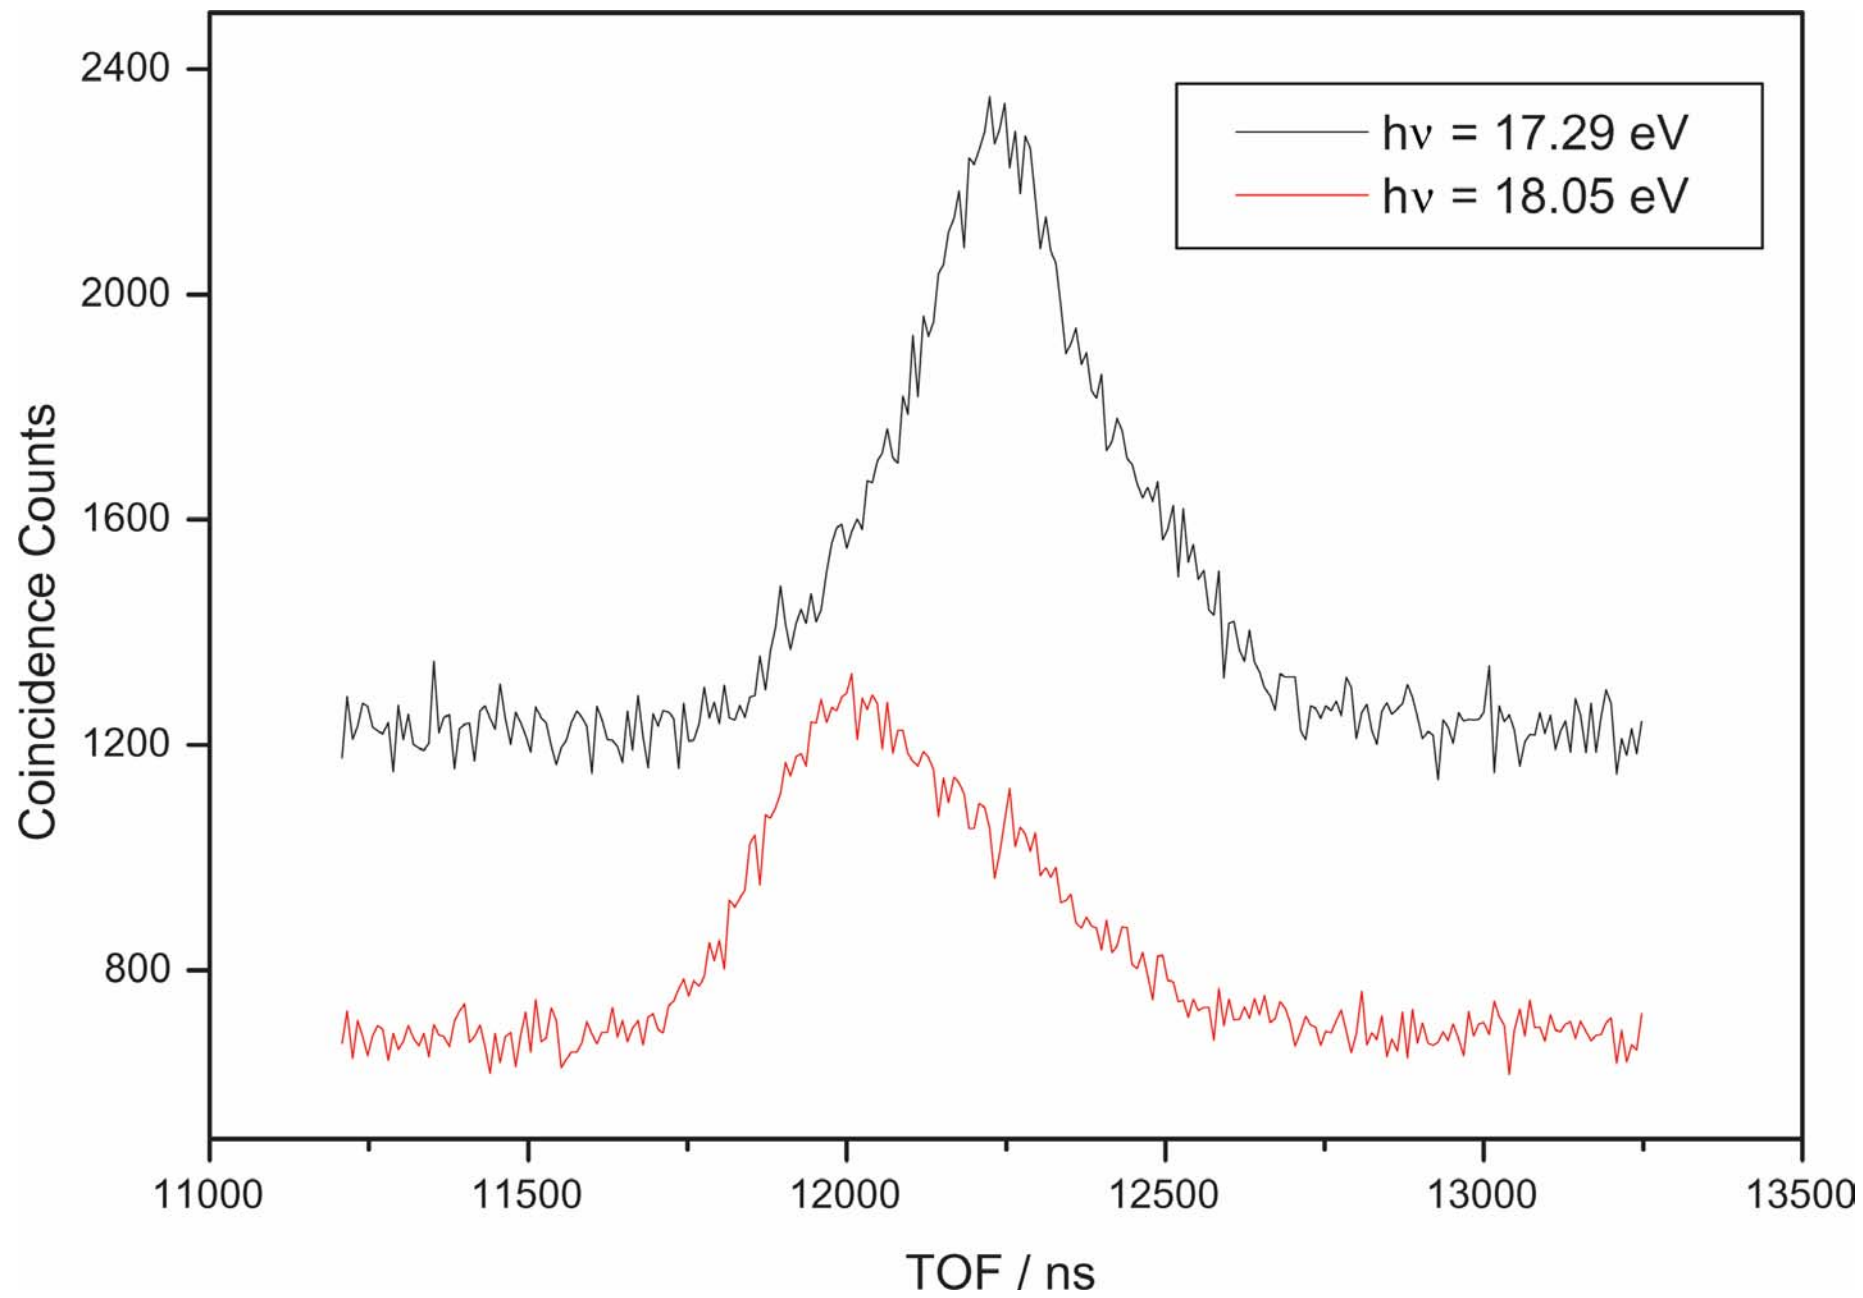

Supplement: fig5.pdf [file fig5.pdf]

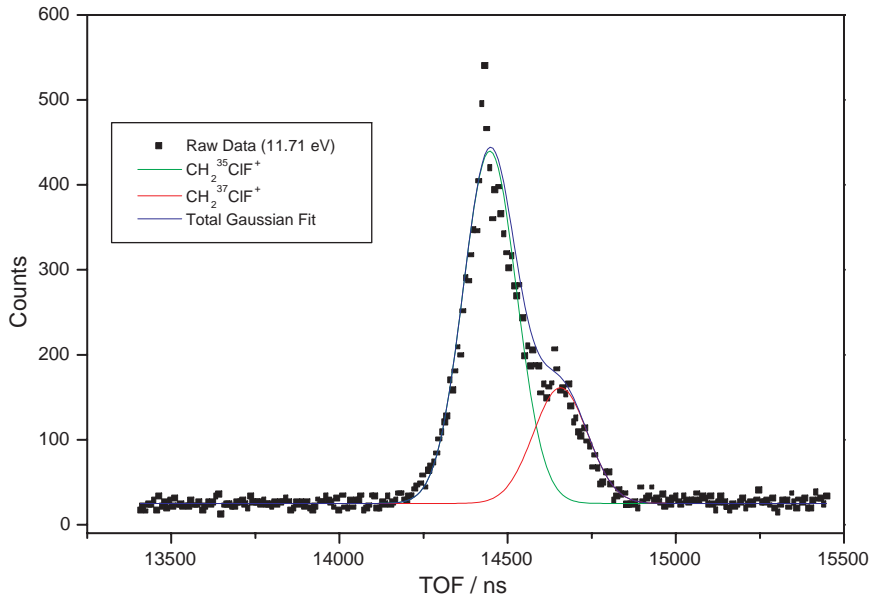

Supplement: fig6.pdf [file fig6.pdf]
